# Supplementary material for: Long-term additions of ammonium nitrate to montane forest ecosystems may cause limited soil acidification, even in the presence of soil carbonate
Source: Copernicus journal article supplement (doi:10.5194/bg-20-4577-2023), 2023-11-23
Supplement: Supplementary file 1 [file bg-20-4577-2023-supplement.pdf]

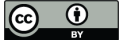

*Supplement of*

## **Long-term additions of ammonium nitrate to montane forest ecosystems may cause limited soil acidification, even in the presence of soil carbonate**

**Thomas Baer et al.**

*Correspondence to:* Patrick Schlegli (patrick.schlegli@wsl.ch)

The copyright of individual parts of the supplement might differ from the article licence.

Table S1: Outputs of linear models for cation and anion concentrations in the precipitation measured at the study site in the Alptal. Explanatory variables are time (1 timestep = 2 weeks), cos and sin of day of year (test for seasonality with sinusoidal regression). The units for  $SO_4^{2-}$ ,  $NO_3^- - N$  and  $NH_4^+ - N$  is mg/l

| Dependant variable | Fixed effect | Estimate | SE     | t-value | p-value | df  | Adjusted R <sup>2</sup> |
|--------------------|--------------|----------|--------|---------|---------|-----|-------------------------|
| pH                 | (Intercept)  | 5.0072   | 0.0495 | 101.241 | < 0.001 | 654 | 0.420                   |
|                    | Time         | 0.0026   | 0.0001 | 20.623  | < 0.001 |     |                         |
|                    | cos          | -0.2642  | 0.0348 | -7.5591 | < 0.001 |     |                         |
|                    | sin          | -0.0021  | 0.0349 | -0.059  | 0.9572  |     |                         |
| $SO_4^{2-}$        | (Intercept)  | 1.0191   | 0.0510 | 19.9959 | < 0.001 | 645 | 0.118                   |
|                    | Time         | -0.0011  | 0.0001 | -8.0492 | < 0.001 |     |                         |
|                    | cos          | -0.1563  | 0.0358 | -4.3590 | < 0.001 |     |                         |
|                    | sin          | 0.0691   | 0.0359 | 1.9245  | 0.0547  |     |                         |
| $NO_3^- - N$       | (Intercept)  | 0.3291   | 0.0150 | 21.9536 | < 0.001 | 654 | 0.085                   |
|                    | Time         | -0.0002  | 0.0000 | -4.3150 | < 0.001 |     |                         |
|                    | cos          | -0.0097  | 0.0105 | -0.9243 | 0.3556  |     |                         |
|                    | sin          | 0.0695   | 0.0106 | 6.5648  | < 0.001 |     |                         |
| $NH_4^+ - N$       | (Intercept)  | 0.3261   | 0.0215 | 15.1577 | < 0.001 | 654 | 0.116                   |
|                    | Time         | <0.0001  | 0.0001 | 0.6922  | 0.4890  |     |                         |
|                    | cos          | -0.1128  | 0.0151 | -7.4518 | < 0.001 |     |                         |
|                    | sin          | 0.0864   | 0.0152 | 5.6874  | < 0.001 |     |                         |

Table S2: Output of linear mixed effects models for pH and total acidity. Calculated with treatment (control or N treated), year (scaled and centred around 0; midpoint at 2011), and interaction (year:treatment). (note: the log of total acidity was used as dependant variable) For total acidity an extra fixed effect, year squared, was added to account for the nonlinearity. The random effect was replication (location of sampling) allowing for random slopes for treatment. Calculations were done for both the O horizon and A horizon separately. The unit for acidity is mmolc/kg.

| Dependant variable | Soil horizon | Fixed effect      | Estimate | SE    | df | t-value | p-value |
|--------------------|--------------|-------------------|----------|-------|----|---------|---------|
| pH                 | O horizon    | (Intercept)       | 4.554    | 0.336 | 52 | 13.564  | <0.001  |
|                    |              | Treatment         | -0.203   | 0.192 | 52 | -1.055  | 0.296   |
|                    |              | Year              | -0.032   | 0.007 | 52 | -4.502  | <0.001  |
|                    |              | Year:treatment    | 0.007    | 0.010 | 52 | 0.656   | 0.515   |
| pH                 | A horizon    | (Intercept)       | 4.837    | 0.288 | 51 | 16.790  | <0.001  |
|                    |              | Treatment         | -0.292   | 0.256 | 51 | -1.137  | 0.261   |
|                    |              | Year              | -0.030   | 0.010 | 51 | -3.064  | 0.004   |
|                    |              | Year:treatment    | 0.016    | 0.013 | 51 | 1.184   | 0.242   |
| Total acidity      | O horizon    | (Intercept)       | 1.455    | 0.162 | 40 | 8.991   | <0.001  |
|                    |              | Treatment         | 0.094    | 0.078 | 40 | 1.199   | 0.237   |
|                    |              | Year              | 0.0004   | 0.003 | 40 | -0.114  | 0.910   |
|                    |              | Year <sup>2</sup> | -0.001   | 0.000 | 40 | -4.910  | <0.001  |
|                    |              | Year:treatment    | 0.004    | 0.004 | 40 | 0.897   | 0.375   |
| Total acidity      | A horizon    | (Intercept)       | 1.106    | 0.173 | 40 | 6.383   | <0.001  |
|                    |              | Treatment         | 0.193    | 0.123 | 40 | 1.567   | 0.125   |
|                    |              | Year              | 0.002    | 0.005 | 40 | 0.337   | 0.738   |
|                    |              | Year <sup>2</sup> | -0.001   | 0.000 | 40 | -3.360  | 0.002   |
|                    |              | Year:treatment    | 0.001    | 0.007 | 40 | 0.093   | 0.927   |

Table S3: Output of linear mixed effects models for total acidity (note: the log of total acidity was used as dependant variable), calculated with treatment (control or N treated), topography (depression and mound), and interaction (topography:treatment). The random effect was replication (location of sampling). Allowing for random slopes for treatment did not converge, for which reason only random intercepts was tested. Calculations were done for both the O horizon and A horizon separately. The unit for acidity is mmolc/kg.

| Dependant variable | Soil horizon | Fixed effect         | Estimate | SE    | df | t-value | p-value |
|--------------------|--------------|----------------------|----------|-------|----|---------|---------|
| Total acidity      | O horizon    | (Intercept)          | 1.090    | 0.058 | 42 | 18.878  | <0.001  |
|                    |              | Treatment            | 0.004    | 0.069 | 42 | 0.058   | 0.954   |
|                    |              | Topography (Mound)   | 0.666    | 0.094 | 3  | 7.124   | 0.006   |
|                    |              | Topography:treatment | 0.205    | 0.110 | 42 | 1.859   | 0.070   |
| Total acidity      | A horizon    | (Intercept)          | 0.722    | 0.079 | 42 | 9.140   | <0.001  |
|                    |              | Treatment            | 0.042    | 0.092 | 42 | 0.461   | 0.647   |
|                    |              | Topography (Mound)   | 0.709    | 0.128 | 3  | 5.555   | 0.012   |
|                    |              | Topography:treatment | 0.348    | 0.147 | 42 | 2.365   | 0.023   |

Table S4: Outputs of linear models for cation and anion concentrations in the runoff water from the control and N treated catchment areas. Explanatory variables are treatment (Control and N treatment), time (1 timestep = 2 weeks), cos and sin of day of year (test for seasonality with sinusoidal regression) and interaction (between treatments over time). The unit for the ions is mg/l.

| Dependant variable            | Fixed effect                 | Estimate    | SE      | t-value  | p-value | df      | Adjusted R <sup>2</sup> |
|-------------------------------|------------------------------|-------------|---------|----------|---------|---------|-------------------------|
| pH                            | (Intercept)                  | 7.5543      | 0.0147  | 512.731  | <0.0001 | 1369    | 0.1149                  |
|                               | Treatment                    | -0.0064     | 0.0132  | -0.4840  | 0.6285  |         |                         |
|                               | Time                         | -0.0004     | 0.0000  | -12.270  | <0.0001 |         |                         |
|                               | cos                          | 0.0520      | 0.0094  | 5.5630   | <0.0001 |         |                         |
|                               | sin                          | 0.0015      | 0.0094  | 0.1640   | 0.8698  |         |                         |
|                               | Interaction                  | -0.0074     | 0.0044  | -1.670   | 0.0952  |         |                         |
|                               | Al <sub>3</sub> <sup>+</sup> | (Intercept) | 0.0887  | 0.0036   | 24.5510 | <0.0001 | 1379                    |
| Treatment                     |                              | -0.0050     | 0.0032  | -1.5495  | 0.1215  |         |                         |
| Time                          |                              | 0.0001      | 0.0000  | 11.2725  | <0.0001 |         |                         |
| cos                           |                              | -0.0419     | 0.0023  | -18.2824 | <0.0001 |         |                         |
| sin                           |                              | -0.0201     | 0.0023  | -8.7601  | <0.0001 |         |                         |
| Interaction                   |                              | 0.0019      | 0.0011  | 1.7974   | 0.0725  |         |                         |
| NO <sub>3</sub> <sup>-</sup>  |                              | (Intercept) | 1.0861  | 0.0885   | 12.2742 | <0.0001 | 1379                    |
|                               | Treatment                    | -0.0002     | 0.0002  | -1.1844  | 0.2364  |         |                         |
|                               | Time                         | 0.2604      | 0.0561  | 4.6428   | <0.0001 |         |                         |
|                               | cos                          | 0.2743      | 0.0561  | 4.8862   | <0.0001 |         |                         |
|                               | sin                          | 1.7090      | 0.0793  | 21.5460  | <0.0001 |         |                         |
|                               | Interaction                  | 0.0332      | 0.0265  | 1.2518   | 0.2109  |         |                         |
|                               | Fe <sub>2</sub> <sup>+</sup> | (Intercept) | 0.1830  | 0.0035   | 52.5869 | <0.0001 | 1379                    |
| Treatment                     |                              | -0.0329     | 0.0031  | -10.5425 | <0.0001 |         |                         |
| Time                          |                              | 0.0000      | 0.0000  | 1.3106   | 0.1902  |         |                         |
| cos                           |                              | -0.0254     | 0.0022  | -11.5101 | <0.0001 |         |                         |
| sin                           |                              | -0.0267     | 0.0022  | -12.0927 | <0.0001 |         |                         |
| Interaction                   |                              | 0.0046      | 0.0010  | 4.4096   | <0.0001 |         |                         |
| SO <sub>4</sub> <sup>2-</sup> |                              | (Intercept) | 1.8209  | 0.0710   | 25.6504 | <0.0001 | 1379                    |
|                               | Treatment                    | 1.0668      | 0.0636  | 16.7653  | <0.0001 |         |                         |
|                               | Time                         | -0.0011     | 0.0002  | -6.8783  | <0.0001 |         |                         |
|                               | cos                          | 0.8073      | 0.0450  | 17.9398  | <0.0001 |         |                         |
|                               | sin                          | -0.2076     | 0.0450  | -4.6111  | <0.0001 |         |                         |
|                               | Interaction                  | 0.1374      | 0.0213  | 6.4616   | <0.0001 |         |                         |
|                               | Ca <sub>2</sub> <sup>+</sup> | (Intercept) | 12.6412 | 0.2374   | 53.2498 | <0.0001 | 1379                    |
| Treatment                     |                              | 2.8603      | 0.2128  | 13.4415  | <0.0001 |         |                         |
| Time                          |                              | -0.0060     | 0.0005  | -11.5920 | <0.0001 |         |                         |
| cos                           |                              | 1.3925      | 0.1505  | 9.2537   | <0.0001 |         |                         |
| sin                           |                              | -0.8514     | 0.1506  | -5.6540  | <0.0001 |         |                         |
| Interaction                   |                              | 0.3147      | 0.0711  | 4.4245   | <0.0001 |         |                         |
